# Supplementary material for: Fluorescence microscopy as an alternative to electron microscopy for microscale dispersion evaluation of organic–inorganic composites
Source: PubMed Central journal article supplement (PMC4895723; doi:10.1038/ncomms11811), 2016-06-02
Supplement: ncomms11811-s1.pdf [file ncomms11811-s1.pdf]

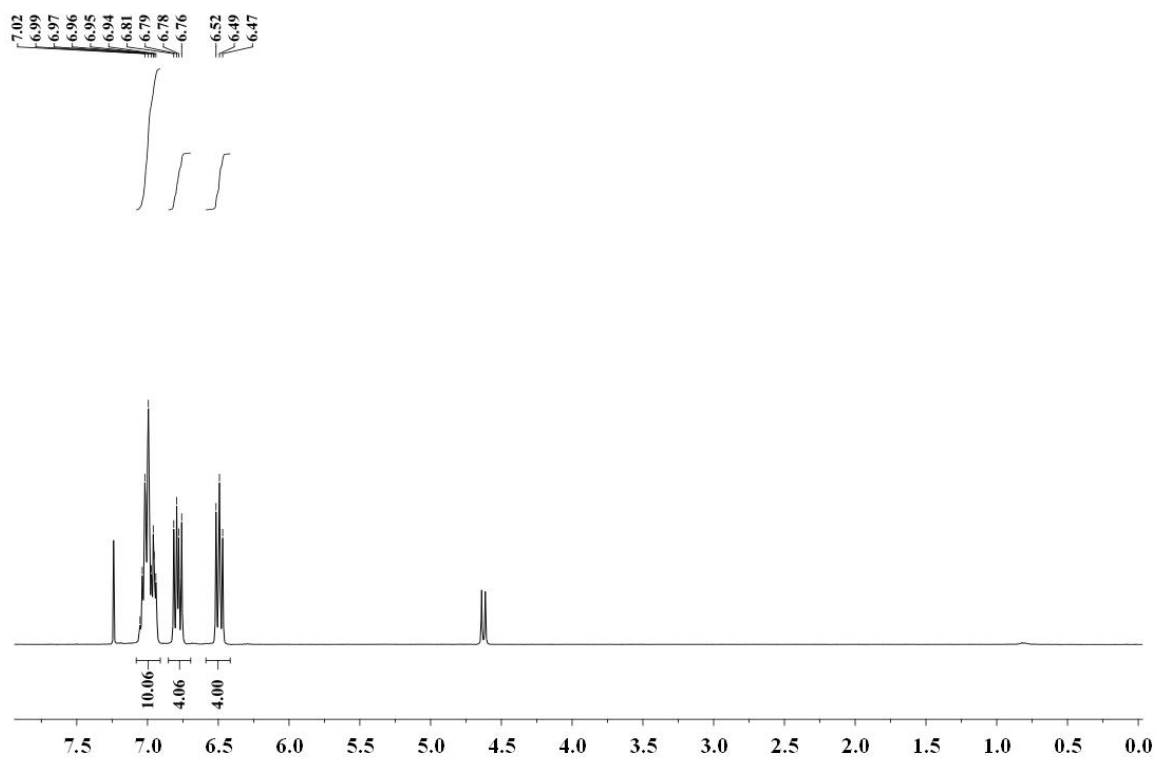

Supplementary Figure 2 |  $^1\text{H}$  NMR spectrum of 1 in  $\text{CDCl}_3$ .

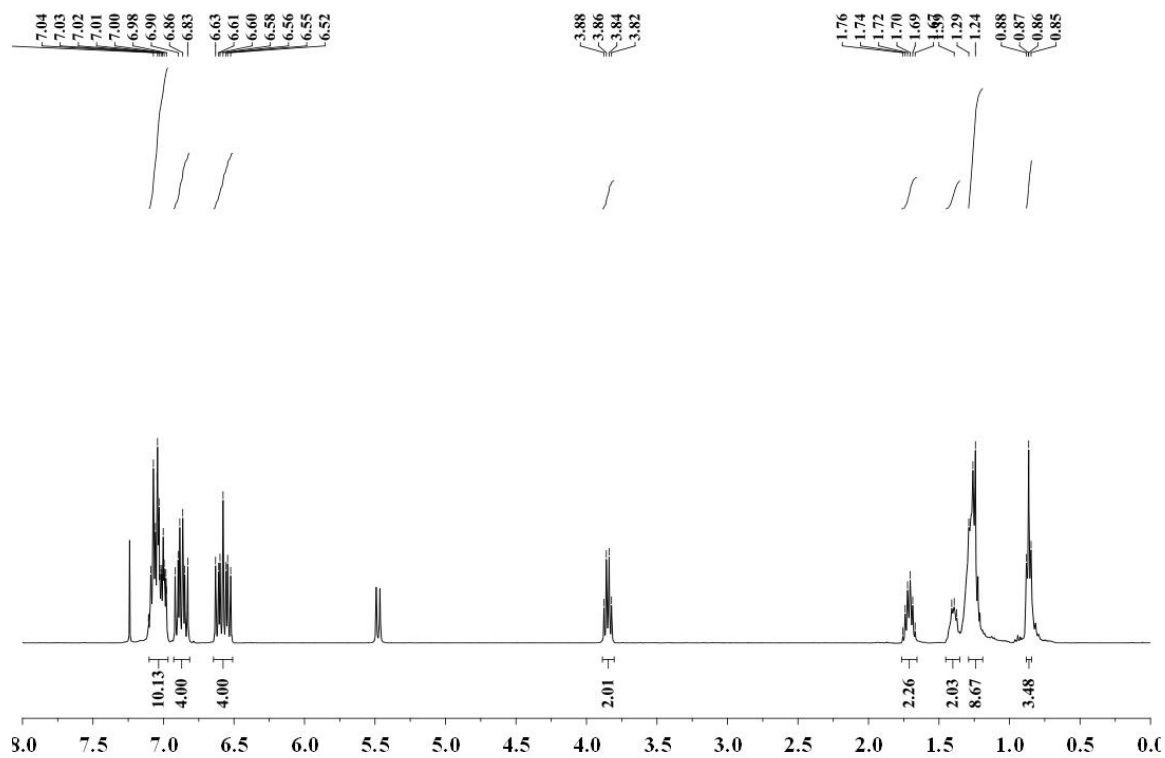

Supplementary Figure 3 |  $^1\text{H}$  NMR spectrum of 2 in  $\text{CDCl}_3$ .

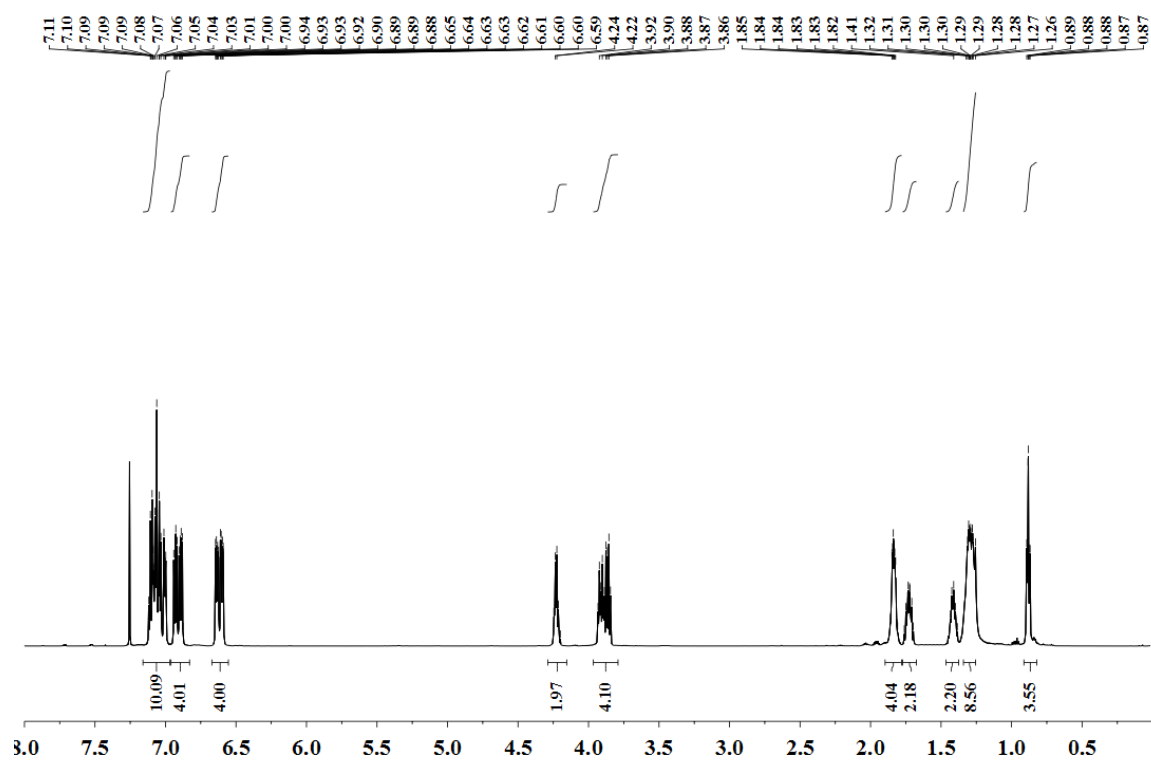

Supplementary Figure 4 |  $^1\text{H}$  NMR spectrum of 3 in  $\text{CDCl}_3$ .

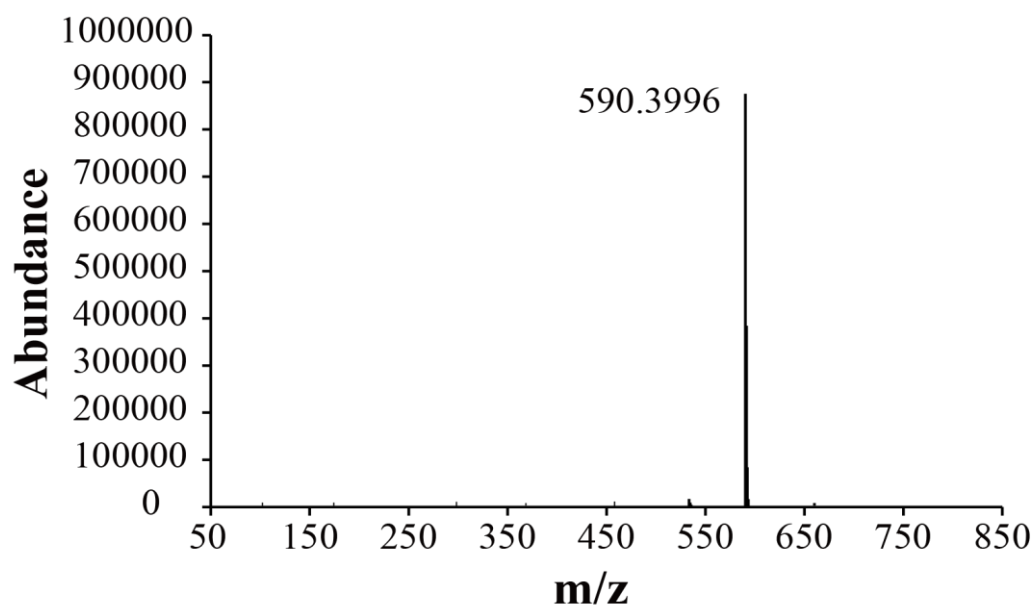

Supplementary Figure 5 | Positive-ion mode ESI-MS spectrum of TPE-DTAB (4).

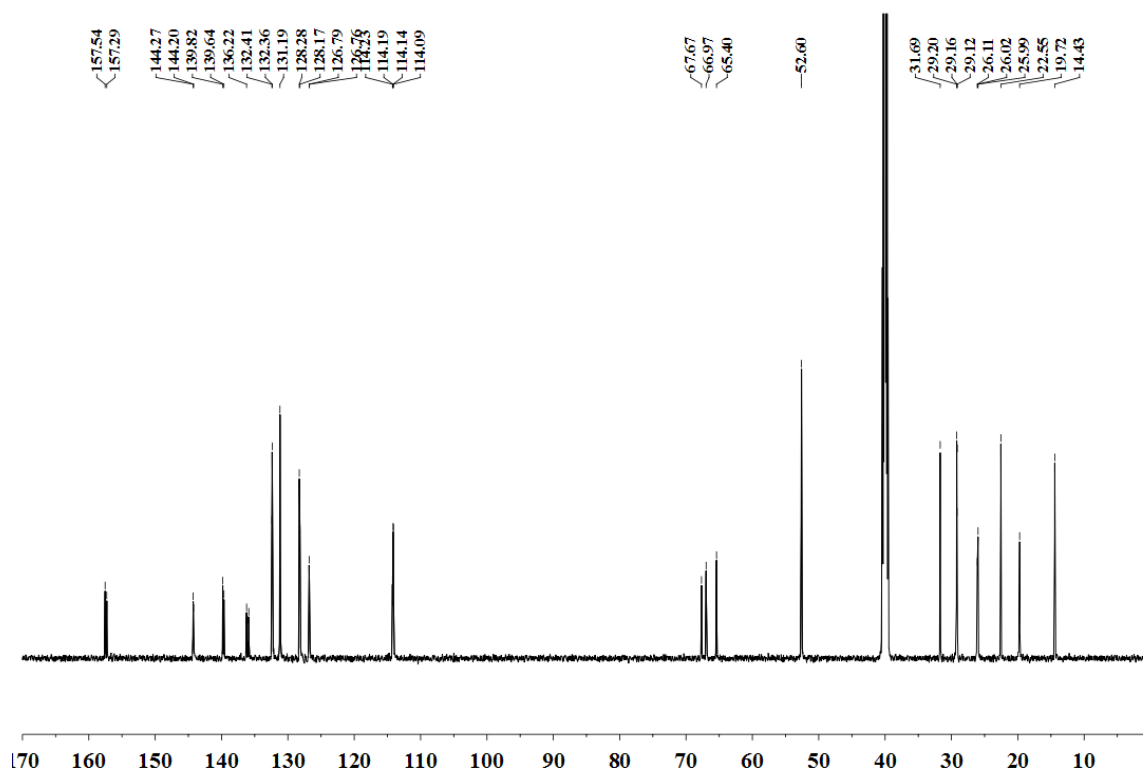

Supplementary Figure 6 |  $^{13}\text{C}$  NMR spectrum of TPE-DTAB (4) in  $\text{DMSO-d}_6$ .

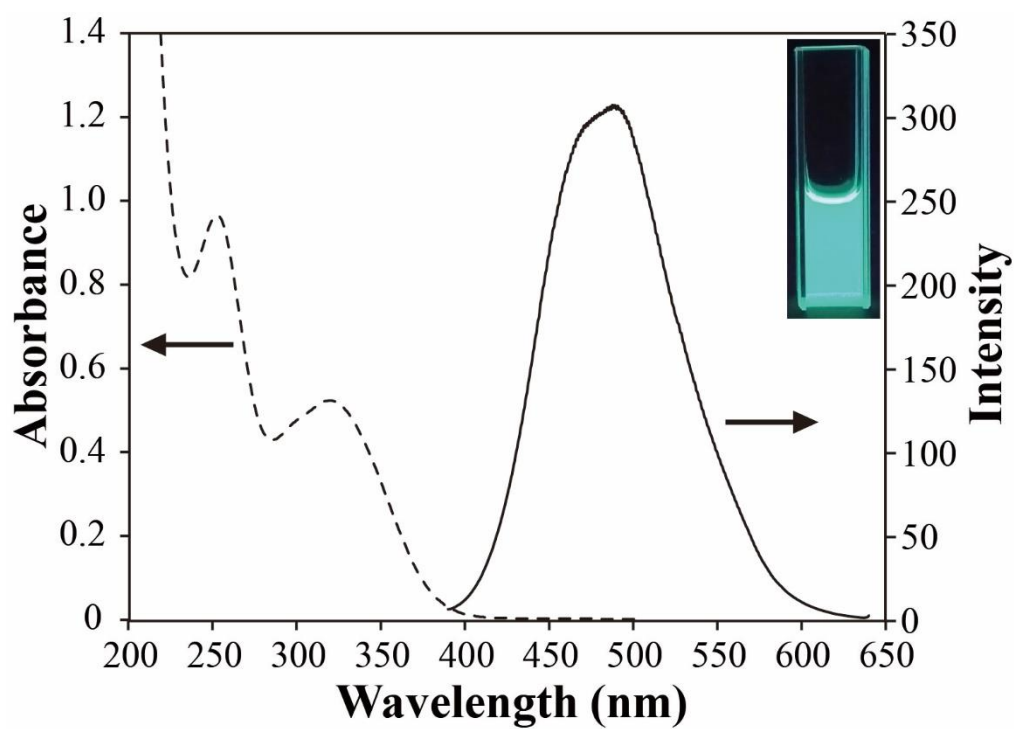

**Supplementary Figure 7 | Optical properties of TPE-DTAB.** UV-visible absorption (dotted line) and fluorescence (solid line) spectra of 40  $\mu\text{M}$  TPE-DTAB aqueous solution.

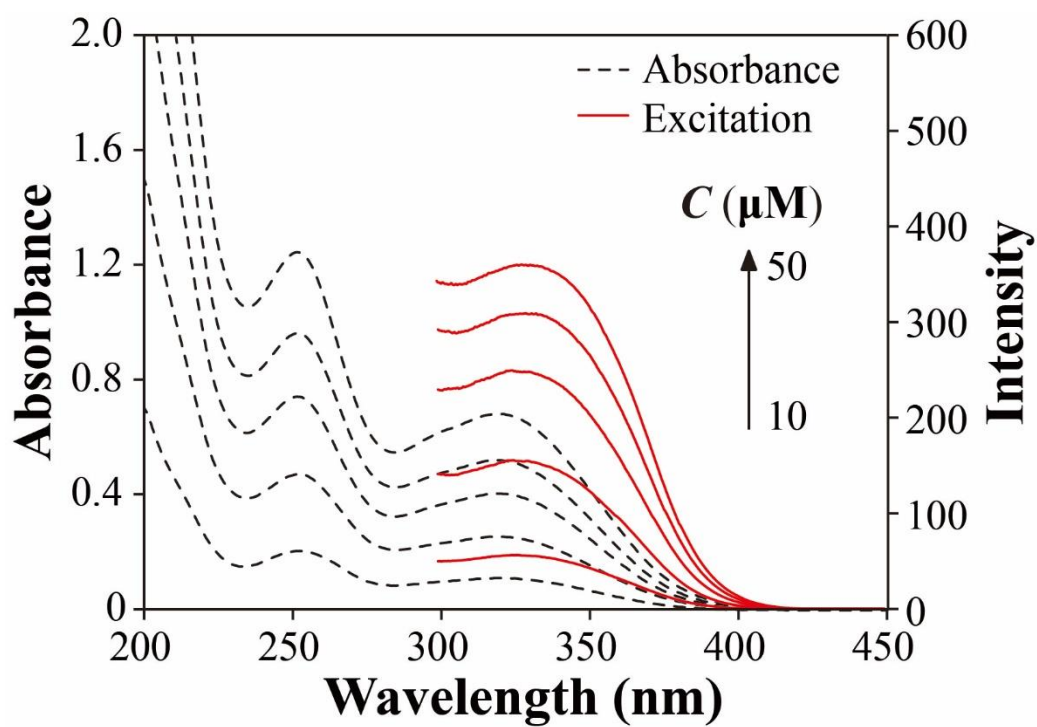

**Supplementary Figure 8 | Optical properties of TPE-DTAB below and above CMC.** UV absorption (dotted line) and fluorescence excitation (solid line) spectra of TPE-DTAB at 10, 20, 30, 40, and 50  $\mu\text{M}$ , respectively.



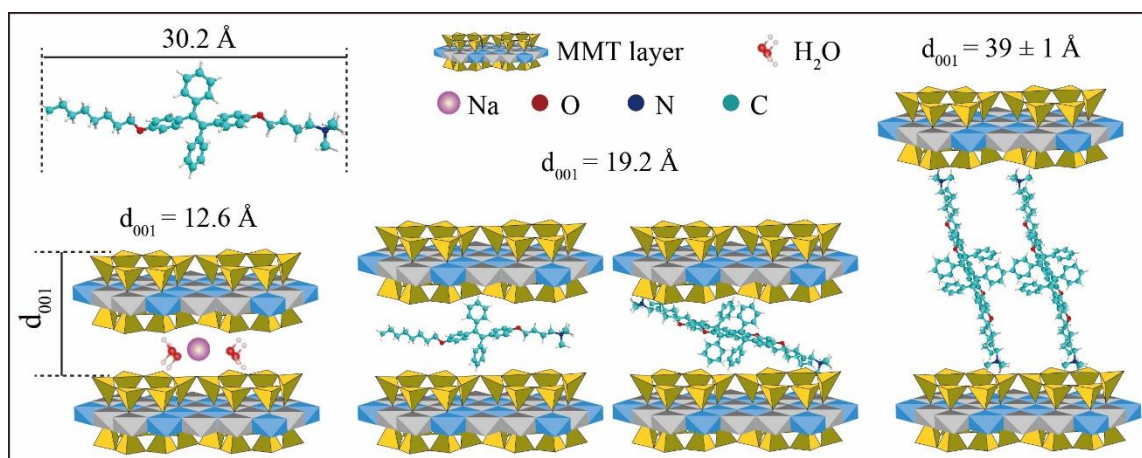

**Supplementary Figure 9 | Schematic representation of the possible arrangement of TPE-DTAB molecules within the MMT layer space.**

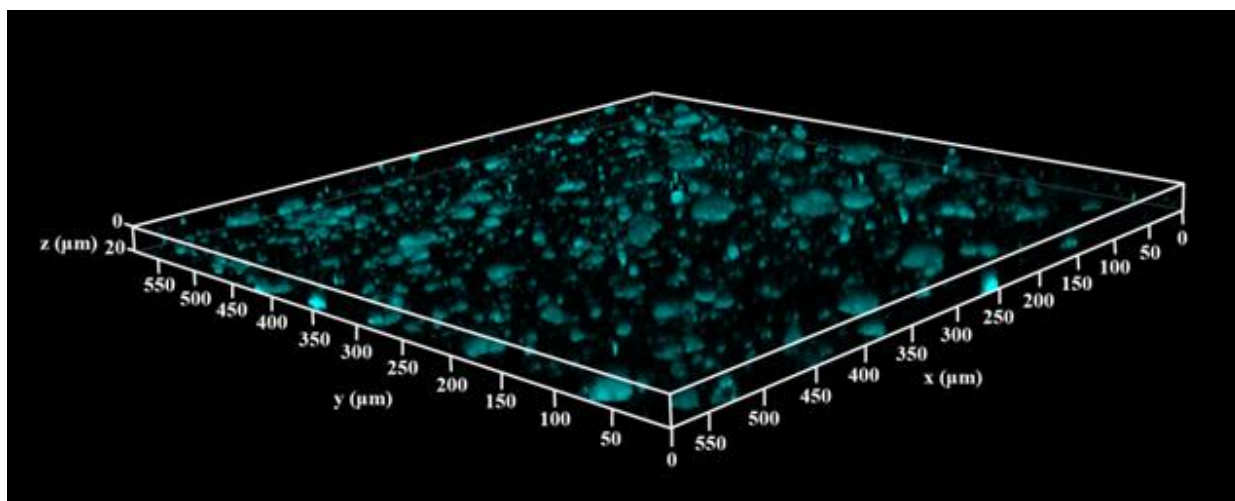

**Supplementary Figure 10 | CFM image of PVC/CTAB/TPE-DTAB modified MMT composite.** The image shows 3D-representation of CTAB/TPE-DTAB modified MMT dispersion (cyan parts) in the PVC/CTAB/TPE-DTAB modified MMT (5 wt%) composite.

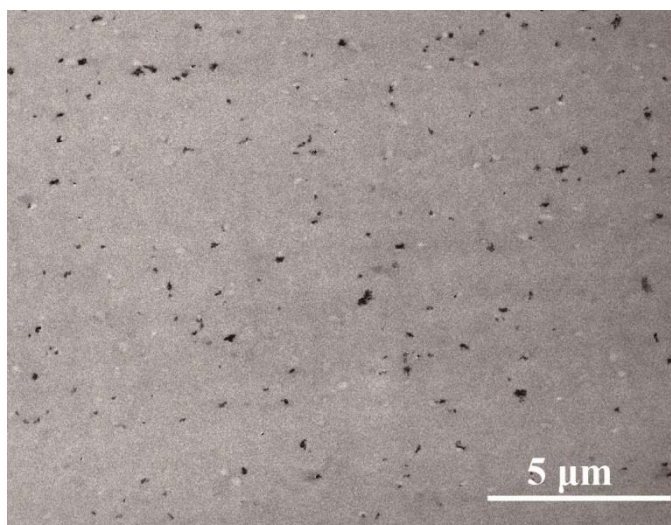

**Supplementary Figure 11 | Cross-sectional TEM micrograph of PVC/TPE-SDS modified LDH (2 wt%) composite.**

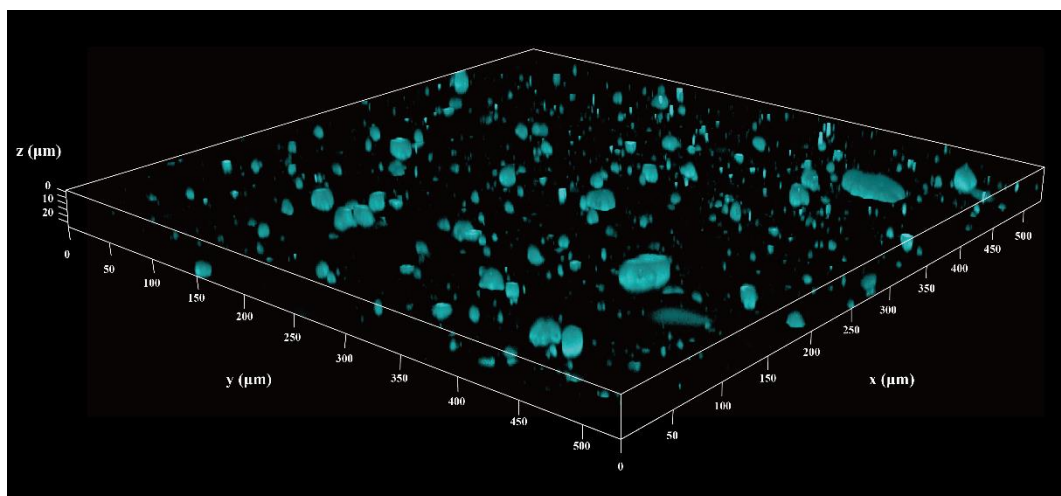

**Supplementary Figure 12 | CFM image of PVC/TPE-SDS modified LDH composite.** The image shows 3D-representation of TPE-SDS modified LDH dispersion (cyan parts) in the PVC/TPE-SDS modified LDH (2 wt%) composite.
